# Supplementary material for: Comparative analyses of multi-species sequences from targeted genomic regions
Source: Springer Nature journal article supplement (doi:10.1038/nature01858), 2003-08-01
Supplement: nature01858-s1.pdf [file nature01858-s1.pdf]

## BAC Isolation, Mapping, and Sequencing

### BAC Isolation and Mapping

BAC clones were isolated from the following libraries:

| Species                                        | BAC Library                                                 | Redundancy             | Reference   |
|------------------------------------------------|-------------------------------------------------------------|------------------------|-------------|
| Chimpanzee<br>( <i>Pan troglodytes</i> )       | RPCI-43<br>(BACPAC Resource)                                | ~3.5-fold              |             |
| Baboon<br>( <i>Papio cynocephalus anubis</i> ) | RPCI-41<br>(BACPAC Resource)                                | ~10.4-fold             |             |
| Cat<br>( <i>Felis catus</i> )                  | RPCI-86<br>(BACPAC Resource)                                | ~10.6-fold             |             |
| Dog<br>( <i>Canis familiaris</i> )             | RPCI-81<br>(BACPAC Resource)                                | ~8.1-fold              | Ref. 1      |
| Cow<br>( <i>Bos taurus</i> )                   | RPCI-42<br>(BACPAC Resource)                                | ~11.9-fold             | Ref. 2      |
| Pig<br>( <i>Sus scrofa</i> )                   | RPCI-44<br>(BACPAC Resource)                                | ~10.2-fold             | Ref. 3      |
| Rat<br>( <i>Rattus norvegicus</i> )            | RPCI-31<br>(BACPAC Resource)                                | ~10.5-fold             | Ref. 4      |
| Mouse<br>( <i>Mus musculus</i> )               | RPCI-23<br>(BACPAC Resource)                                | ~11.2-fold             | Ref. 5      |
| Chicken<br>( <i>Gallus gallus</i> )            | White Leghorn JFID256<br>Red Jungle Fowl 31-JF256-BI (TAMU) | ~5.4-fold<br>~5.2-fold | Refs. 6 & 7 |
| Fugu<br>( <i>Fugu rubripes</i> )               | BAC/Fugu<br>(Genome Systems, Inc.)                          | ~10.0-fold             |             |
| Tetraodon<br>( <i>Tetraodon nigroviridis</i> ) | GSTNA                                                       | ~7.0-fold              | Ref. 8      |
| Zebrafish<br>( <i>Danio rerio</i> )            | BAC/Zebrafish<br>(Genome Systems, Inc.)                     | ~3.0-fold              |             |

Note that the initial 12 species selected for sequencing included two non-human primates (chimpanzee and baboon), two carnivores (cat and dog), two artiodactyls (cow and pig), two rodents (rat and mouse), one bird (chicken), and three fish (two pufferfish, fugu and tetraodon, and zebrafish). This group simply reflects species for which BAC libraries were available at the time we initiated our program.

BACs were obtained from the BACPAC Resource (see [www.chori.org/bacpac](http://www.chori.org/bacpac)) for the first eight libraries, from the Texas A & M GENEfinder Genomic Resource (see [BACserver.tamu.edu](http://BACserver.tamu.edu)) for the chicken library, from Genome Systems, Inc. for the fugu and zebrafish libraries, and from Drs. J. Weissenbach and H. Roest Crolius (Genoscope, France) for the tetraodon library.

Clone isolation from the mouse BAC library was performed as described<sup>9</sup>. Clone isolation and characterization from the rat BAC library were described previously<sup>10</sup>. For the other mammals, ‘universal’ hybridization probes<sup>11</sup> were used for clone isolation and nascent contig construction, when necessary supplemented with probes derived from orthologous species-specific or BAC-end sequences. Fugu clones were isolated by use of available orthologous genomic sequence<sup>12</sup> and subsequent walking with BAC-end sequences. Isolation of zebrafish and chicken clones involved generating probes specific for identified orthologous sequences, when available, and subsequent contig extension by walking with BAC-end sequences. Tetraodon clones were selected computationally based

on the identification of tetraodon BAC-end sequences<sup>8</sup> that aligned to orthologous fugu sequence.

### **BAC Sequencing**

BACs were sequenced using a standard shotgun-sequencing strategy<sup>13,14</sup>. In brief, purified BAC DNA (see [genome.wustl.edu/tools/protocols](http://genome.wustl.edu/tools/protocols)) was kinetically sheared with a Hydroshear instrument (GeneMachines, San Carlos, CA), and the resulting fragments were end repaired with T4 DNA polymerase and Klenow. BstXI/EcoRI linkers (Invitrogen, Carlsbad, CA) were ligated to the end-repaired fragments, and the ligated DNA was then size selected (1.5-3.0 kb) by agarose gel electrophoresis and subcloned into the plasmid pOTWI3. Sequence reads were generated from both insert ends of randomly selected subclones using BigDye dye-terminator chemistry and model 3700 automated DNA sequencing instruments (Applied Biosystems, Foster City, CA). Following the generation of an estimated ~10-fold sequence redundancy (based on the measured insert size of each starting BAC), sequences were assembled and edited using the Phred/Phrap/Consed suite of programs<sup>15-17</sup> (see [www.phrap.org](http://www.phrap.org)). Manual inspection of the assembled sequences allowed readily apparent errors, artifacts, and misassemblies to be corrected. Contigs were ordered and oriented based on read-pair associations of gap-spanning subclones and sequence overlaps between neighboring clones. For virtually all of the sequence reported here, finishing was then performed to the standards established for sequencing the human genome (see [genome.wustl.edu/Overview/finrulesname.php?G16=1](http://genome.wustl.edu/Overview/finrulesname.php?G16=1)), which includes the absence of gaps and an error rate of less than 1 in 10,000 bp. Additional details and protocols are available on request.

A summary of the generated sequence data set is provided below (note that this is a more detailed version of Table 1 of the main paper):

---

**Sequence generated from the greater *CFTR* region in 12 non-human vertebrates**


---

| Species                                     | Non-redundant<br>Total bp | No.<br>BACs | Finished<br>BACs* | Clone<br>Gaps† | Sequence<br>Gaps§ |
|---------------------------------------------|---------------------------|-------------|-------------------|----------------|-------------------|
| Chimpanzee ( <i>Pan troglodytes</i> )       | 1,317,858                 | 11          | 11                | 2              | 0                 |
| Baboon ( <i>Papio cynocephalus anubis</i> ) | 1,508,413                 | 11          | 10                | 0              | 2                 |
| Cat ( <i>Felis catus</i> )                  | 1,357,338                 | 12          | 11                | 2              | 3                 |
| Dog ( <i>Canis familiaris</i> )             | 1,195,669                 | 8           | 6                 | 4              | 10                |
| Cow ( <i>Bos taurus</i> )                   | 1,480,745                 | 11          | 11                | 0              | 0                 |
| Pig ( <i>Sus scrofa</i> )                   | 1,077,879                 | 8           | 8                 | 1              | 0                 |
| Rat ( <i>Rattus norvegicus</i> )            | 1,600,751                 | 15          | 14                | 0              | 3                 |
| Mouse ( <i>Mus musculus</i> )               | 1,486,509                 | 10          | 10                | 0              | 0                 |
| Chicken ( <i>Gallus gallus</i> )            | 415,528                   | 5           | 5                 | 0              | 0                 |
| Fugu ( <i>Fugu rubripes</i> )‡              | 273,624                   | 4           | 4                 | 0              | 0                 |
| Tetraodon ( <i>Tetraodon nigroviridis</i> ) | 257,833                   | 3           | 3                 | 0              | 0                 |
| Zebrafish ( <i>Danio rerio</i> )¶           | 162,514                   | 3           | 3                 | 1              | 0                 |

---

\* Number of BACs sequenced to the standards for finishing human genomic sequence. For the remaining few BACs, the order and orientation of all sequence contigs were established.

† Number of gaps between non-overlapping BACs within the clone tiling path.

§ Number of sequence gaps within the sequenced BACs.

|| Includes ~150 kb of sequence that we generated previously (GenBank No. AF162137) and reported by Ellsworth *et al.*<sup>18</sup>.

‡ Includes ~36 kb of sequence generated previously (GenBank No. AJ009961.1) and reported by Cottage *et al.*<sup>19</sup>

¶ Includes some non-orthologous sequence.

Below are listed each of the sequenced BACs, sorted by species:

| <b>SPECIES</b> | <b>BAC NAME</b> | <b>GENBANK NO.</b> |
|----------------|-----------------|--------------------|
| baboon         | RP41-479B1      | AC084730.2         |
| baboon         | RP41-12N1       | AC084729.2         |
| baboon         | RP41-150K7      | AC087214.4         |
| baboon         | RP41-455I14     | AC087215.3         |
| baboon         | RP41-265N24     | AC087252.3         |
| baboon         | RP41-416C2      | AC087598.3         |
| baboon         | RP41-63I4       | AC087555.3         |
| baboon         | RP41-384C5      | AC089990.3         |
| baboon         | RP41-468N20     | AC091381.3         |
| baboon         | RP41-187H19     | AC087806.3         |
| baboon         | RP41-353B7      | AC087103.3         |
| cat            | RP86-177C24     | AC087421.2         |
| cat            | RP86-294B21     | AC087807.2         |
| cat            | RP86-49M22      | AC087861.2         |
| cat            | RP86-459O8      | AC087731.2         |
| cat            | RP86-523H23     | AC090033.2         |
| cat            | RP86-439N5      | AC087514.2         |
| cat            | RP86-181L4      | AC089994.2         |
| cat            | RP86-238N12     | AC117940.3         |
| cat            | RP86-87J17      | AC091436.3         |
| cat            | RP86-264L24     | AC091382.3         |
| cat            | RP86-317G18     | AC091094.2         |
| cat            | RP86-565O15     | AC117941.3         |
| chicken        | XXbac-68C5      | AC091708.2         |
| chicken        | WAG-65N20       | AC084760.2         |
| chicken        | WAG-105M15      | AC091725.2         |
| chicken        | WAG-55C14       | AC087179.2         |
| chicken        | WAG-69H2        | AC084761.2         |
| chimp          | RP43-144M20     | AC087512.2         |
| chimp          | RP43-22H1       | AC087265.2         |
| chimp          | RP43-150N20     | AC087253.2         |
| chimp          | RP43-150N19     | AC087264.3         |
| chimp          | RP43-143F17     | AC087729.2         |
| chimp          | RP43-126A24     | AC087777.2         |
| chimp          | RP43-176G10     | AC091637.1         |
| chimp          | RP43-89H17      | AC087730.2         |
| chimp          | RP43-124I17     | AC087834.2         |
| chimp          | RP43-75L6       | AC090112.2         |
| chimp          | RP43-93P21      | AC087835.2         |
| cow            | RP42-400M23     | AC090976.2         |
| cow            | RP42-552E5      | AC090961.2         |
| cow            | RP42-550C12     | AC087843.2         |
| cow            | RP42-135P2      | AC087860.2         |
| cow            | RP42-194K3      | AC089991.2         |
| cow            | RP42-341K3      | AC090031.2         |

Thomas *et al.* Supplementary Information #1 - 5

|       |             |            |
|-------|-------------|------------|
| cow   | RP42-332L24 | AC122112.2 |
| cow   | RP42-99M11  | AC091728.2 |
| cow   | RP42-210F11 | AC089992.2 |
| cow   | RP42-553M7  | AC089993.2 |
| cow   | RP42-324C24 | AC091252.3 |
| dog   | RP81-391L22 | AC090972.5 |
| dog   | RP81-55A4   | AC090445.2 |
| dog   | RP81-386E20 | AC090032.2 |
| dog   | RP81-196D8  | AC090890.3 |
| dog   | RP81-142A6  | AC091119.2 |
| dog   | RP81-256F7  | AC092249.3 |
| dog   | RP81-156O18 | AC090889.3 |
| dog   | RP81-182F3  | AC117937.3 |
| fugu  | 242D16      | AC090119.1 |
| fugu  | NA          | AJ009961.1 |
| fugu  | 250A8       | AC091727.2 |
| fugu  | 244C11      | AC087333.2 |
| mouse | RP23-11G22  | AC023173.3 |
| mouse | RP23-208N9  | AC024950.3 |
| mouse | RP23-73G15  | AC092495.2 |
| mouse | RP23-40I5   | AC027285.4 |
| mouse | RP23-86H7   | AC068561.2 |
| mouse | NA          | AF162137.2 |
| mouse | RP23-219K14 | AC027654.3 |
| mouse | RP23-230F22 | AC090712.4 |
| pig   | RP44-56M21  | AC087424.2 |
| pig   | RP44-55G2   | AC087423.2 |
| pig   | RP44-254M15 | AC104718.1 |
| pig   | RP44-338P10 | AC087180.2 |
| pig   | RP44-418J7  | AC087160.2 |
| pig   | RP44-519O7  | AC096884.2 |
| pig   | RP44-360A14 | AC092478.2 |
| pig   | RP44-30C22  | AC092497.2 |
| rat   | RP31-331N5  | AC087102.3 |
| rat   | RP31-425H6  | AC121515.2 |
| rat   | RP31-314L24 | AC087042.2 |
| rat   | RP31-230B14 | AC087101.2 |
| rat   | RP31-188L2  | AC087041.2 |
| rat   | RP31-40H10  | AC087067.3 |
| rat   | RP31-194D8  | AC087066.3 |
| rat   | RP31-162L19 | AC087112.2 |
| rat   | RP31-422M21 | AC087213.2 |
| rat   | RP31-210K23 | AC090444.2 |
| rat   | RP31-536L14 | AC091268.2 |
| rat   | RP31-464J4  | AC087775.2 |
| rat   | RP31-186N2  | AC087251.2 |
| rat   | RP31-52E16  | AC087776.2 |
| rat   | RP31-249D7  | AC087218.2 |

|           |             |            |
|-----------|-------------|------------|
| tetraodon | GSTNA-28E1  | AC113580.3 |
| tetraodon | GSTNA-45F12 | AC113581.3 |
| tetraodon | GSTNA-27O10 | AC113579.3 |
| zebrafish | 66I19       | AC087105.2 |
| zebrafish | 91J1        | AC087254.2 |
| zebrafish | 20A7        | AC087104.2 |

## References

1. Li, R. *et al.* Construction and characterization of an eightfold redundant dog genomic bacterial artificial chromosome library. *Genomics* **58**, 9-17 (1999).
2. Warren, W. *et al.* Construction and characterization of a new bovine bacterial artificial chromosome library with 10 genome-equivalent coverage. *Mamm. Genome* **11**, 662-663 (2000).
3. Fahrenkrug, S.C. *et al.* A porcine BAC library with tenfold genome coverage: a resource for physical and genetic map integration. *Mamm. Genome* **12**, 472-474 (2001).
4. Woon, P.Y. *et al.* Construction and characterization of a 10-fold genome equivalent rat P1-derived artificial chromosome library. *Genomics* **50**, 306-316 (1998).
5. Osoegawa, K. *et al.* Bacterial artificial chromosome libraries for mouse sequencing and functional analysis. *Genome Res.* **10**, 116-128 (2000).
6. Crooijmans, R.P., Vrebalov, J., Dijkhof, R.J., van der Poel, J.J. & Groenen, M.A. Two-dimensional screening of the Wageningen chicken BAC library. *Mamm. Genome* **11**, 360-363 (2000).
7. Lee, M.-K. *et al.* Construction and characterization of three BAC libraries for analysis of the chicken genome. *Animal Genetics* **34**, 151-152 (2003).
8. Roest Crollius, H. *et al.* Characterization and repeat analysis of the compact genome of the freshwater pufferfish *Tetraodon nigroviridis*. *Genome Res.* **10**, 939-949 (2000).
9. Thomas, J.W. *et al.* Comparative genome mapping in the sequence-based era: early experience with human chromosome 7. *Genome Res.* **10**, 624-633 (2000).
10. Summers, T.J. *et al.* Comparative physical mapping of targeted regions of the rat genome. *Mamm. Genome* **12**, 508-512 (2001).
11. Thomas, J.W. *et al.* Parallel construction of orthologous sequence-ready clone contig maps in multiple species. *Genome Res.* **12**, 1277-1285 (2002).

12. Elgar, G. *et al.* Generation and analysis of 25 Mb of genomic DNA from the pufferfish *Fugu rubripes* by sequence scanning. *Genome Res.* **9**, 960-971 (1999).
13. Wilson, R.K. & Mardis, E.R. Genome analysis: a laboratory manual. Vol. 1 Analyzing DNA. Birren, B., Green, E.D., Klapholz, S., Myers, R.M. & Roskams, J. (eds.), pp. 397-454 (Cold Spring Harbor Laboratory Press, Cold Spring Harbor, New York, 1997).
14. Green, E.D. Strategies for the systematic sequencing of complex genomes. *Nat. Rev. Genet.* **2**, 573-583 (2001).
15. Ewing, B., Hillier, L., Wendl, M.C. & Green, P. Base-calling of automated sequencer traces using *Phred*. I. accuracy assessment. *Genome Res.* **8**, 175-185 (1998).
16. Ewing, B. & Green, P. Base-calling of automated sequencer traces using *Phred*. II. error probabilities. *Genome Res.* **8**, 186-194 (1998).
17. Gordon, D., Abajian, C. & Green, P. *Consed*: A graphical tool for sequence finishing. *Genome Res.* **8**, 195-202 (1998).
18. Ellsworth, R.E. *et al.* Comparative genomic sequence analysis of the human and mouse cystic fibrosis transmembrane conductance regulator genes. *Proc. Natl. Acad. Sci.* **97**, 1172-1177 (2000).
19. Cottage, A. *et al.* Three receptor genes for plasminogen related growth factors in the genome of the puffer fish *Fugu rubripes*. *FEBS Lett.* **443**, 370-374 (1999).
